# Supplementary material
Source: publisher figshare collection journal article supplement (https://gsajournals.figshare.com/ndownloader/files/13297313)
Supplement: Supplementary file 1 [file 13297313]

## Sheet: X-linked DEG
Table S5.1 Differentially expressed X-linked genes by maternal nutrition in sheep fetal tissues
Comparision	Tissue	Gene	Expression in controls (TPM)	Expression in treated (TPM)	Log2 FC*
Con vs. Over	Brain	ASB9	2.02475	3.9024	1.12776
		GPR101	7.68713	0.139705	-1.33881
		NR0B1	1.50855	0.806238	-1.07402
		PAGE4	99.8027	0.179903	-inf
		PIH1D3	4.10696	2.01195	1.80134
		S100G	33.6247	0.455933	-inf
		SOX3	1.22508	0.146445	-inf
	Kidney	EGFL6	62.0293	100.416	1.05364
		FIGF	12.1161	9.81845	-1.41165
		KCNE5	1.70823	0.266523	-inf
		LOC101110213	0.812348	1.99735	1.54279
		LOC101113919	0.329683	1.34837	1.93396
		LOC101114167	2.17849	3.98904	1.12826
		LOC101121750	1.24018	1.68744	1.1741
		LOC105605468	0.492197	1.29833	1.19356
		LOC105610402	2.75536	1.3774	-1.45875
		LOC106990558	11.5829	7.09259	-1.27246
		PAGE4	1.4623	0.857102	-3.23069
		POF1B	1.53373	0.370765	-1.80474
		POU3F4	3.5142	1.40392	-1.49438
		S100G	937.426	509.344	-1.8667
		SRPK3	1.11411	0.250839	-1.90304
		STS	2.29035	1.50919	-1.00989
	Lung	ATP7A	2.10591	1.23958	-1.08771
		CLDN2	0.256649	6.35562	4.71
		LOC101102787	3.88406	1.52958	-1.49124
		LOC105605568	0.668727	1.4161	1.31705
		SLC6A14	1.57354	0.336912	-1.04553
Con vs. Res	Brain	AMELX	1.03514	1.37762	-1.54546
		CAPN6	34.9084	1.46304	-1.51478
		DUSP21	0.083855	1.03672	5.21057
		GJB1	3.39948	30.2038	1.59979
		GPR101	7.68713	1.99557	-1.2004
		LOC101115187	1.32372	1.48329	1.35153
		LOC101123349	208.347	76.7434	-1.42865
		LOC105605613	1.09587	2.25981	1.19481
		LOC105610402	1.03885	0	-inf
		LOC106990380	4.25762	1.94401	-1.29061
		NXT2	2.37686	3.87592	1.11797
		PAGE4	99.8027	1.85518	-1.32851
		PIH1D3	4.10696	2.53209	1.58334
		PLP1	1526.85	14380.7	1.61361
		PLXNB3	12.4885	62.15	1.2272
		S100G	33.6247	1.26935	-5.1963
		SRPK3	5.0104	24.9021	1.53141
		SRPX	8.01321	3.81528	-1.04828
		TEX11	2.34915	5.25589	1.52682
		TEX13B	1.72084	0.732938	-1.14214
		TNMD	4.36555	2.18222	-1.29356
	Kidney	GABRA3	0.38852	1.24775	1.08916
		PAGE4	1.4623	2.78667	1.07229
		SLC38A5	6.52989	3.45582	-1.3778
	Lung	LOC101102787	3.88406	1.82181	-1.67469
		LOC101108987	15.4776	3.31542	-1.80351
		LOC101110649	38.1467	22.7574	-1.59669
		LOC101115187	0.454913	1.32736	1.08468
		PDZD4	3.36154	1.95906	-1.11812
		PLP1	1.20701	1.089	-1.23719
		SLC6A14	1.57354	0.10335	-5.42961
*: Log2 transformed fold change calculated by boot-strapping analysis.

## Sheet: GO term
Table S5.2 GO category of X-linked DEGs
Term	Gene count	%	P-Value	Genes
GO:0007530 sex determination	2	4.44444	0.0297906	SOX3, NR0B1
%: percent of total X-linked DEGs
